# Supplementary material
Source: bioRxiv or medRxiv preprint supplement (https://medrxiv.org/highwire/filestream/70091/field_highwire_adjunct_files/0/19011023-1.pdf)
Supplement: Supplementary file [file 19011023-1.pdf]

## SUPPLEMENTAL MATERIAL

This is a supplemental material of the following article submitted to MedRxiv.

Oyake K, Suzuki M, Otaka Y, Tanaka S.

Motivational Strategies for Stroke Rehabilitation: A Descriptive Cross-sectional Study

### Supplemental Figures

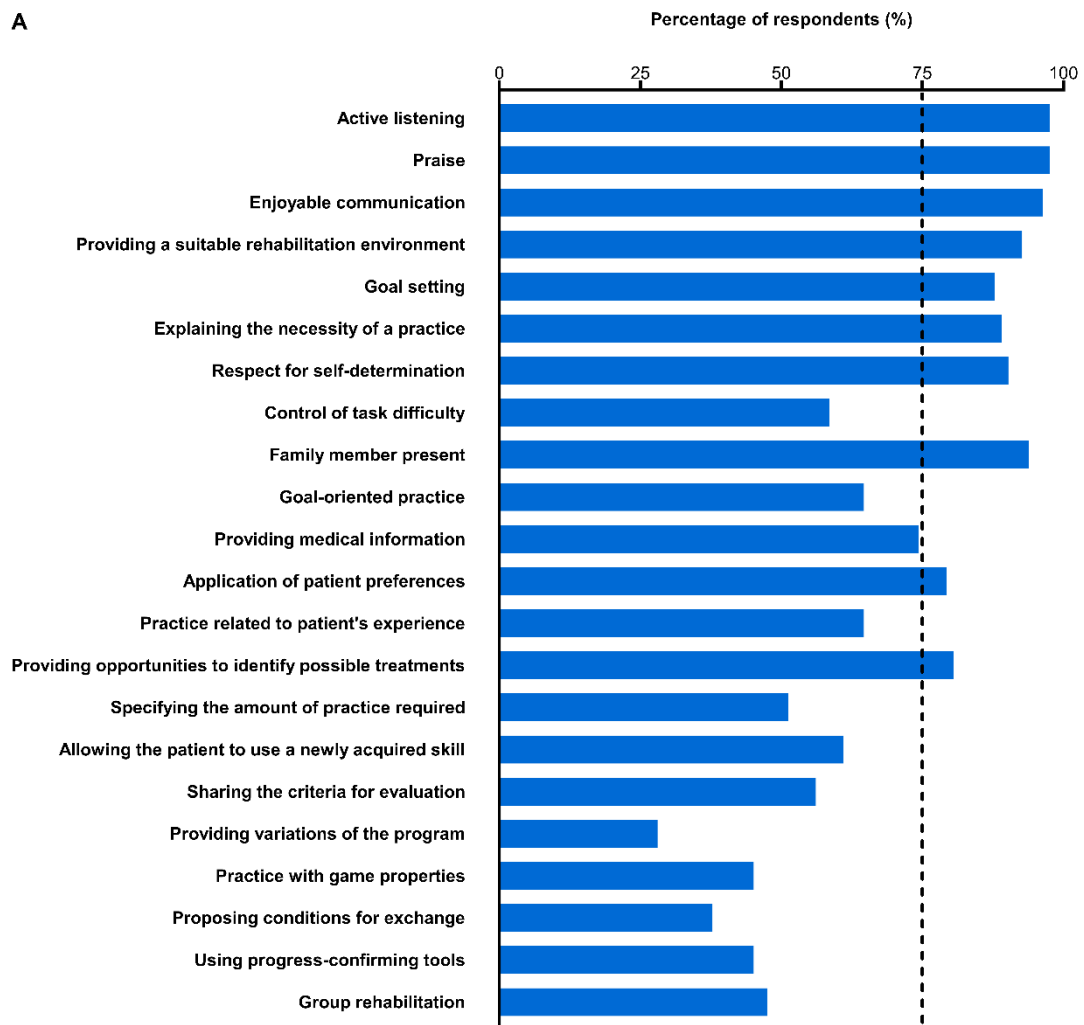

**B**

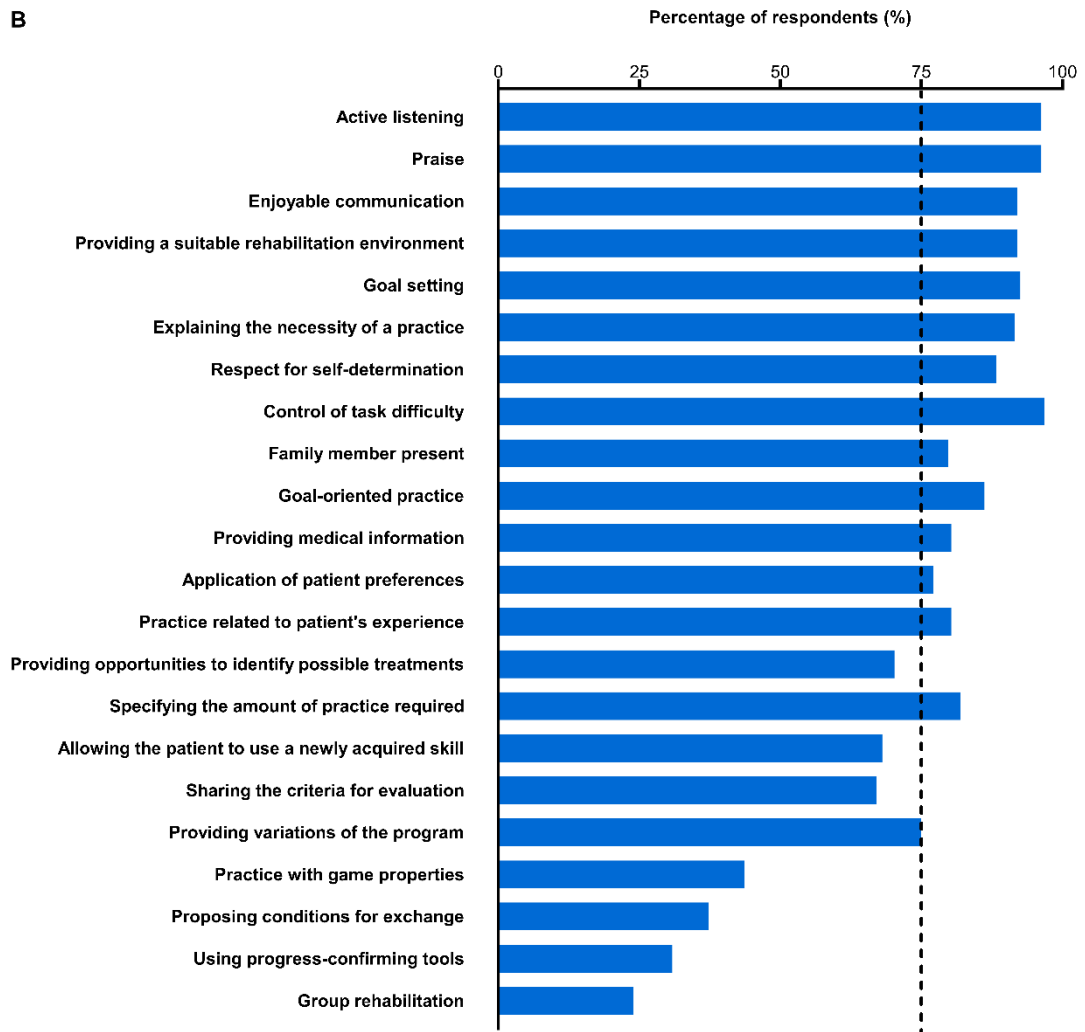

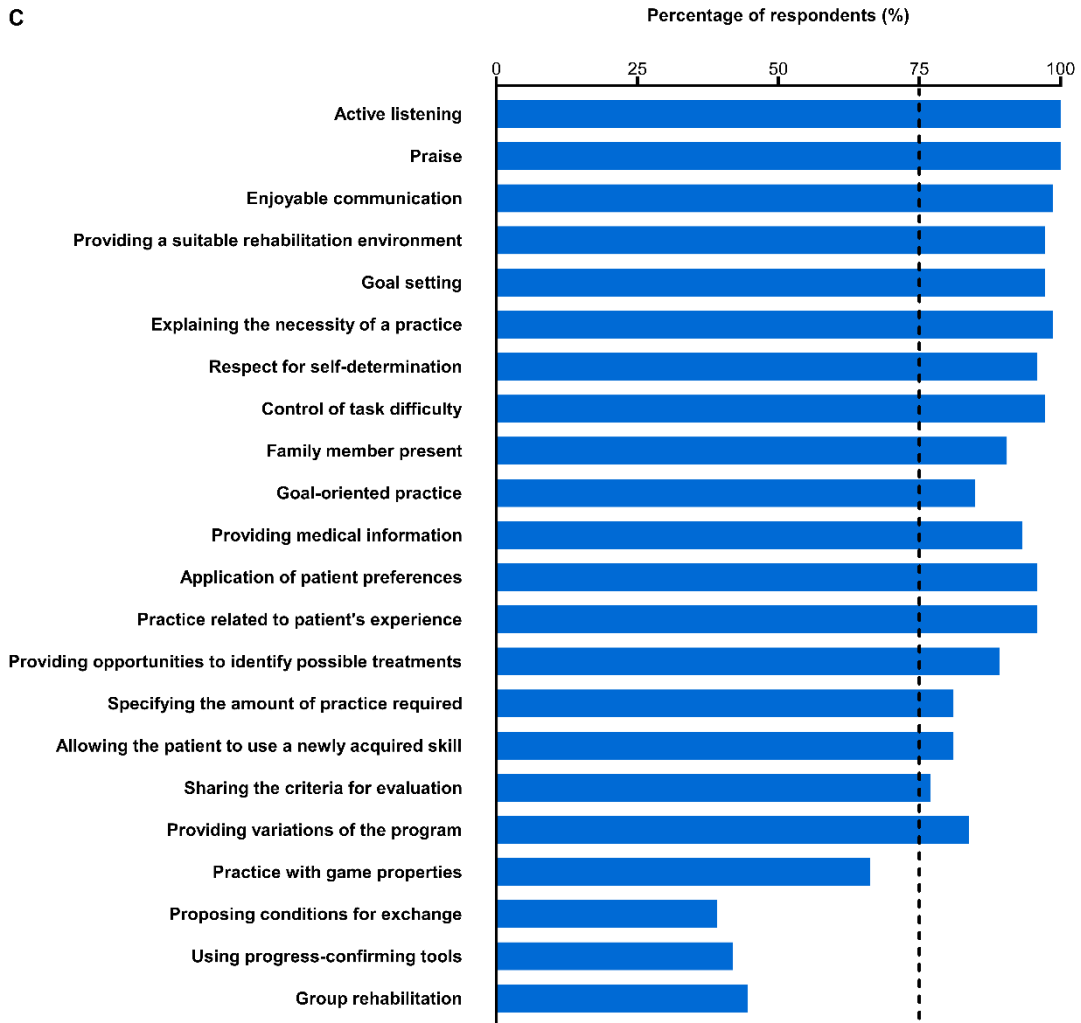

**Figure 1.** The percentage of respondents who used each of the presented motivational strategies in nurses (A), physical therapists (B), and occupational therapists (C). The vertical dashed line represents 75% of the respondents. The order corresponds to Figure 3.

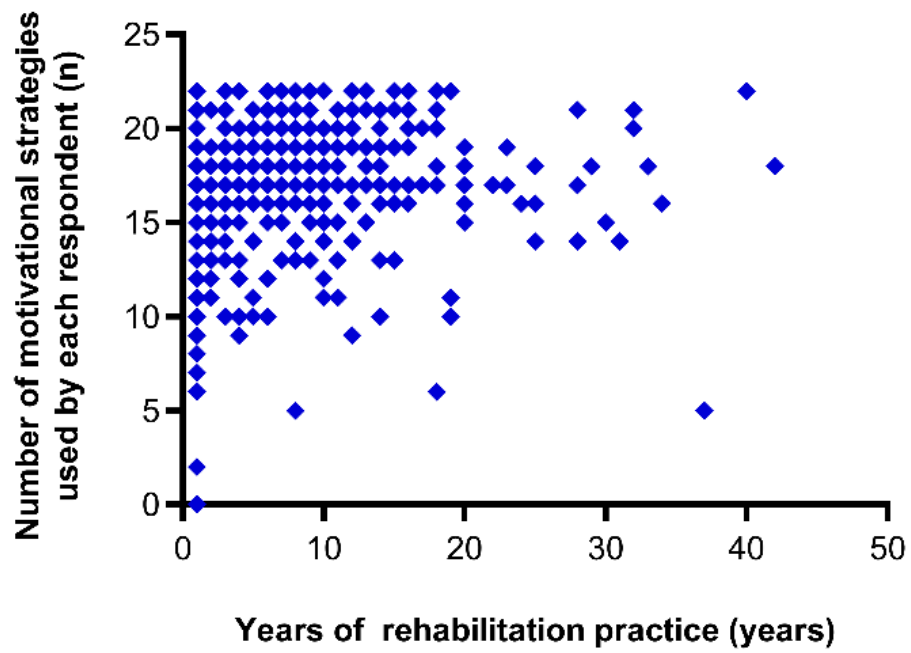

*Figure II.* Correlation between the number of motivational strategies used by each respondent and years of rehabilitation practice.

Supplemental Tables

**Table I.** *The presented outcomes to be assessed for motivating a patient with stroke*

---

|          |
|----------|
| Outcomes |
|----------|

---

Cognitive function (e.g. higher brain dysfunction and dementia)  
Comorbidities (e.g. psychological disorder, diabetes mellitus, and infection)  
Demographic characteristics such as age and sex  
Diagnosis (e.g. ischemic or hemorrhagic, lesion site, and recurrence)  
Human environment (e.g. key person and family)  
Patient's reaction to a resented motivational strategy  
Personality  
Physical function (e.g. muscle weakness, limited range of motion, and sensory dysfunction)  
Severity of activity limitations  
Severity of participation restrictions  
Social environment (e.g. economic condition and employment status)

---

Outcomes are arranged in alphabetical order.

**Table II.** *The additional motivational strategies proposed from respondents*

| Motivational strategy             | Number of responses |
|-----------------------------------|---------------------|
| A medical prescription            | 1                   |
| Do not lie to a patient           | 1                   |
| Practice with a patient           | 1                   |
| Providing feedback on the results | 3                   |

The reported motivational strategies are arranged in alphabetical order.
